# Supplementary material for: Nanostructured Iron Sulfide/N, S Dual-Doped Carbon Nanotube-Graphene Composites as Efficient Electrocatalysts for Oxygen Reduction Reaction
Source: MDPI journal article supplement (doi:10.3390/ma14092146), 2021-04-23
Supplement: s1 [file s1]

Supplementary Materials

# Nanostructured Iron Sulfide/N, S Dual-Doped Carbon Nanotube-Graphene Composites as Efficient Electrocatalysts for Oxygen Reduction Reaction

Gyu Sik Chae <sup>1</sup>, Duck Hyun Youn <sup>2,\*</sup> and Jae Sung Lee <sup>3,\*</sup>

<sup>1</sup> Division of Environmental Science and Engineering, Pohang University of Science and Technology (POSTECH), Pohang 37673, Korea; she213@postech.ac.kr

<sup>2</sup> Department of Chemical Engineering, Interdisciplinary Program in Advanced Functional Materials and Devices Development, Kangwon National University, Chuncheon, Gangwon-do 24341, Korea

<sup>3</sup> School of Energy & Chemical Engineering, Ulsan National University of Science and Technology (UNIST), Ulsan 44919, Korea

\* Correspondence: youndh@kangwon.ac.kr (D.H.Y.); jlee1234@unist.ac.kr (J.S.L.)

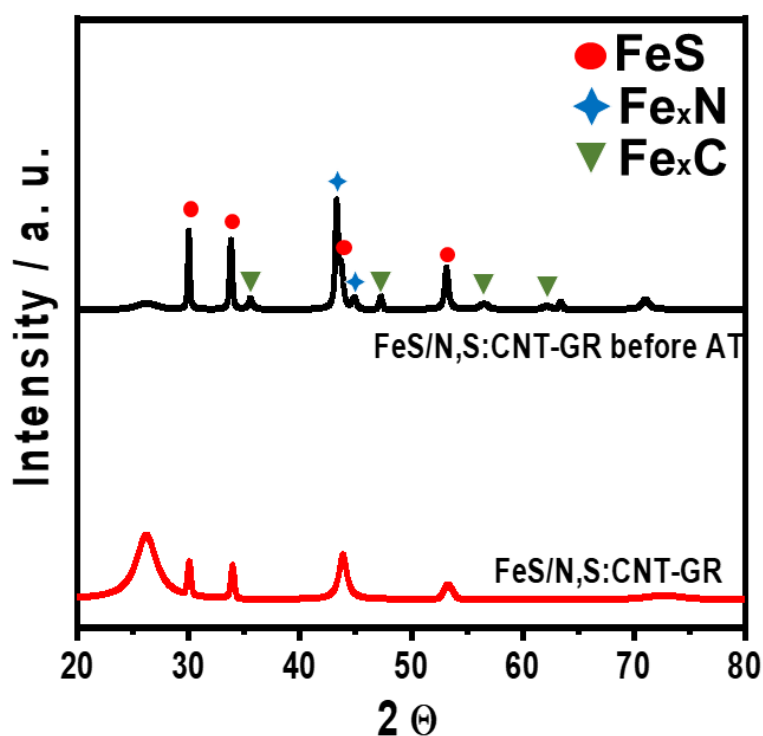

Figure S1. XRD patterns of FeS/N,S:CNT-GR catalyst before and after acid treatment.

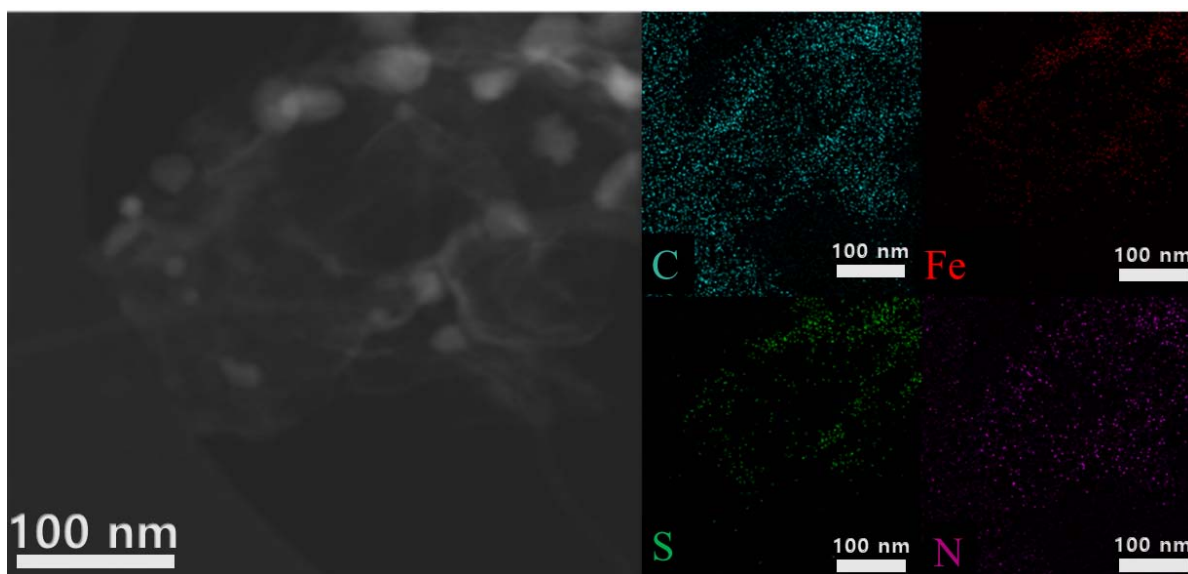

Figure S2. EDS elemental mapping images of FeS/N,S:CNT-GR for C, Fe, S, and N.

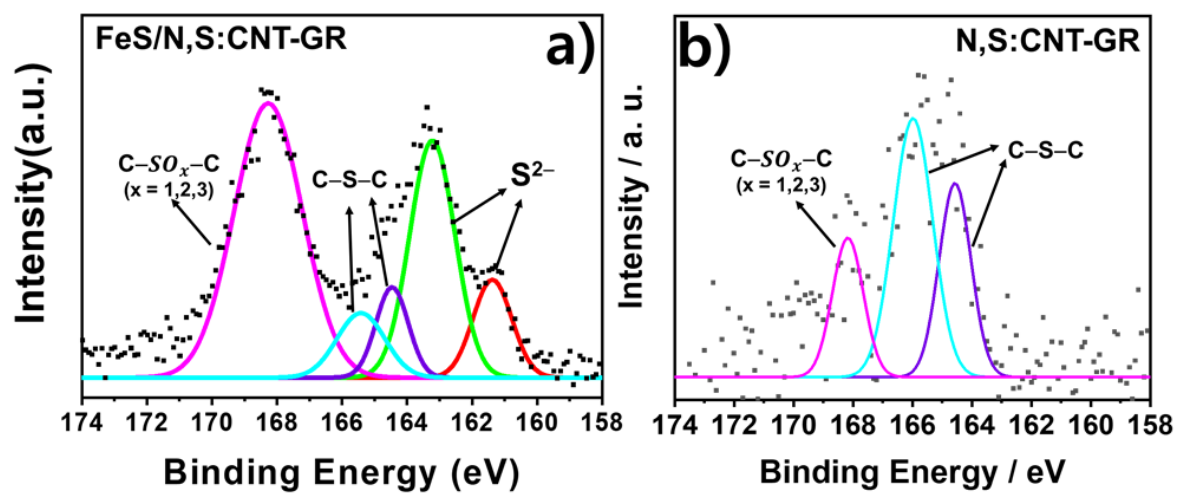

Figure S3. XPS S 2p spectra of (a) FeS/N,S:CNT-GR and (b) N,S:CNT-GR.

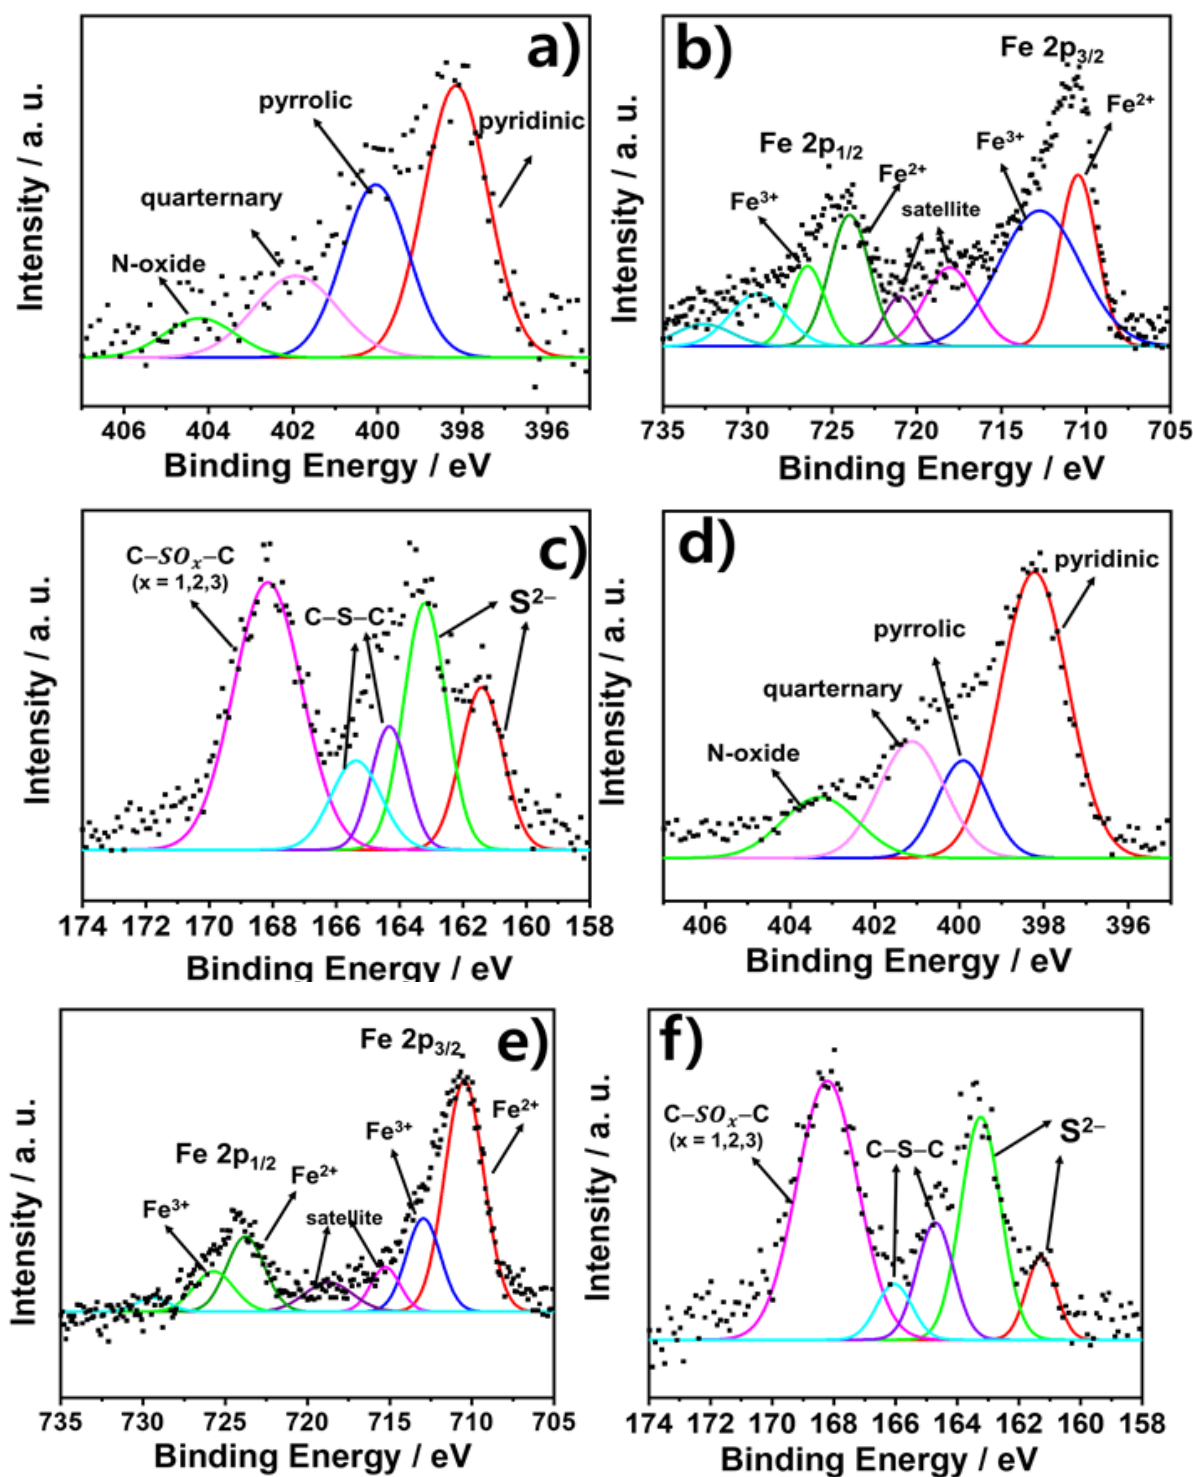

**Figure S4.** XPS spectra of FeS/N,S:CNT for (a) N 1s, (b) Fe 2p, and (c) S 2p. XPS spectra of FeS/N,S:GR for (d) N 1s, (e) Fe 2p, and (f) S 2p.

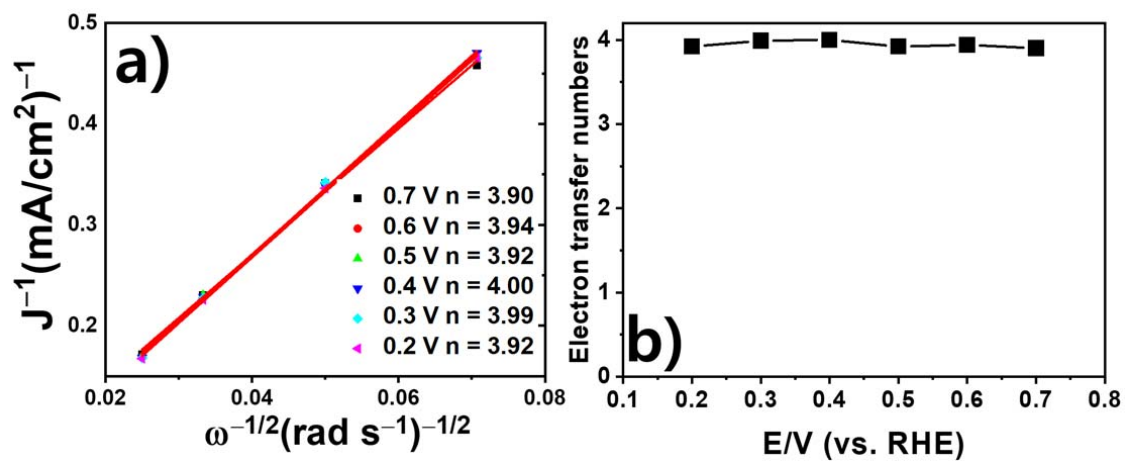

**Figure S5.** (a) Koutecky-Levich plots and (b) corresponding electron transfer number of FeS/N,S:CNT-GR at different potentials.

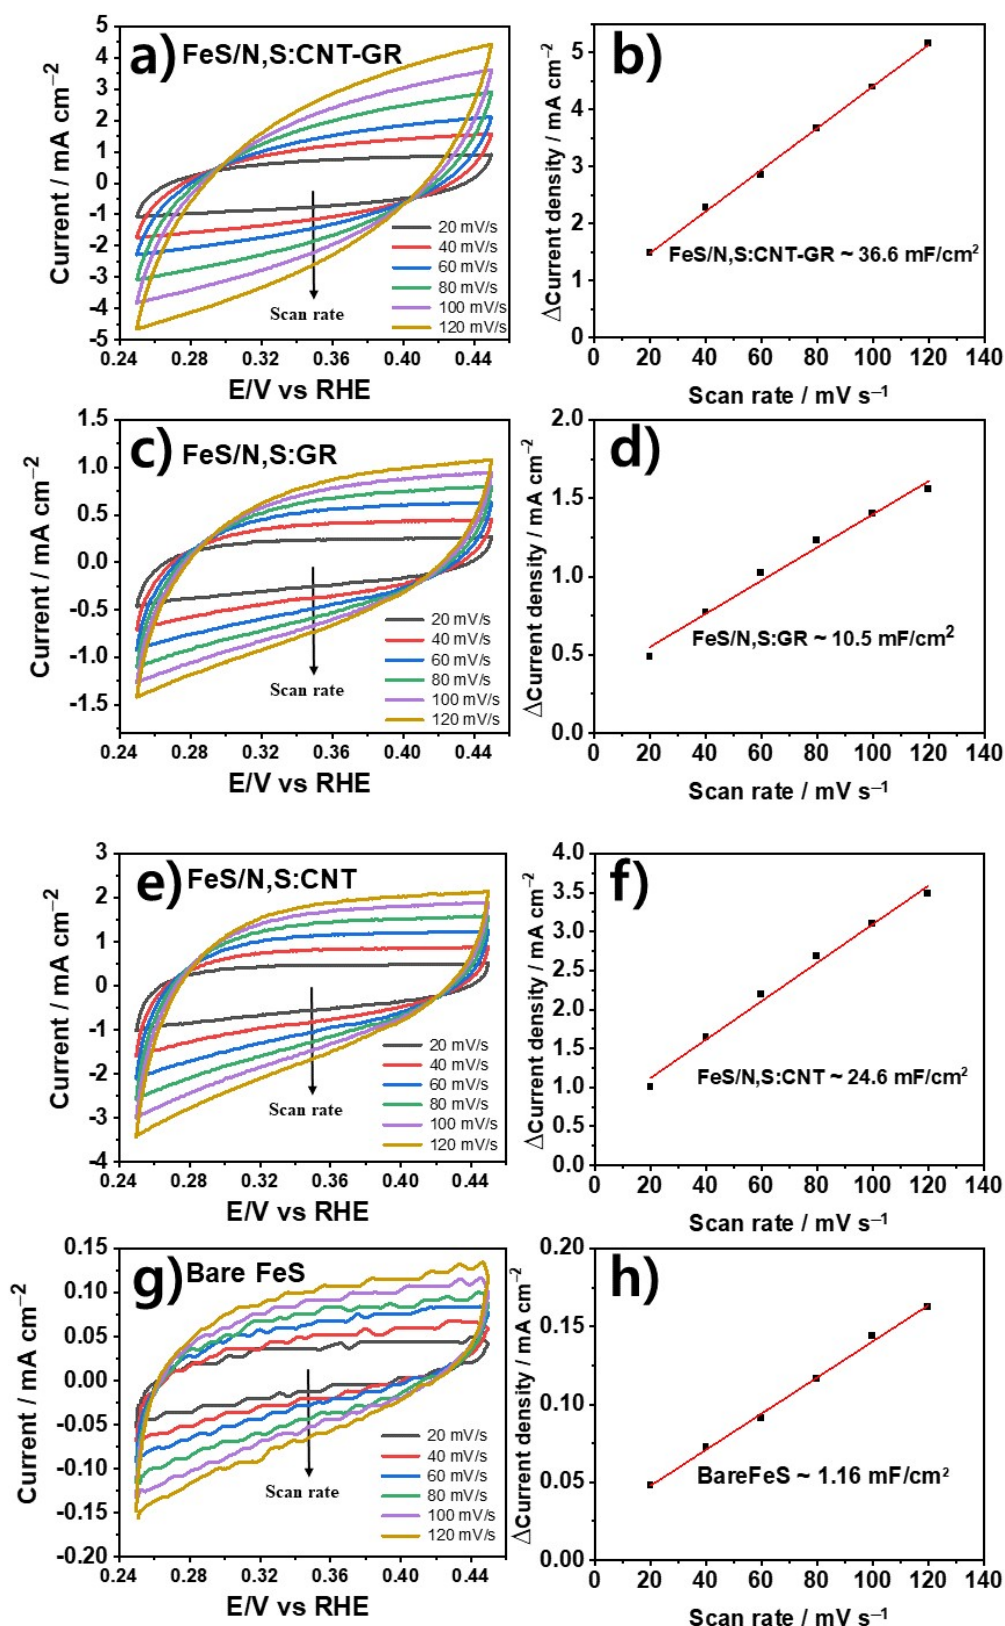

**Figure S6.** Cyclic voltammograms at different scan rates in  $\text{N}_2$ -saturated KOH solution and  $C_{dl}$  calculation of (a,b) FeS/N,S:CNT-GR, (c,d) FeS/N,S:GR, (e,f) FeS/N,S:CNT, and (g,h) bare FeS.

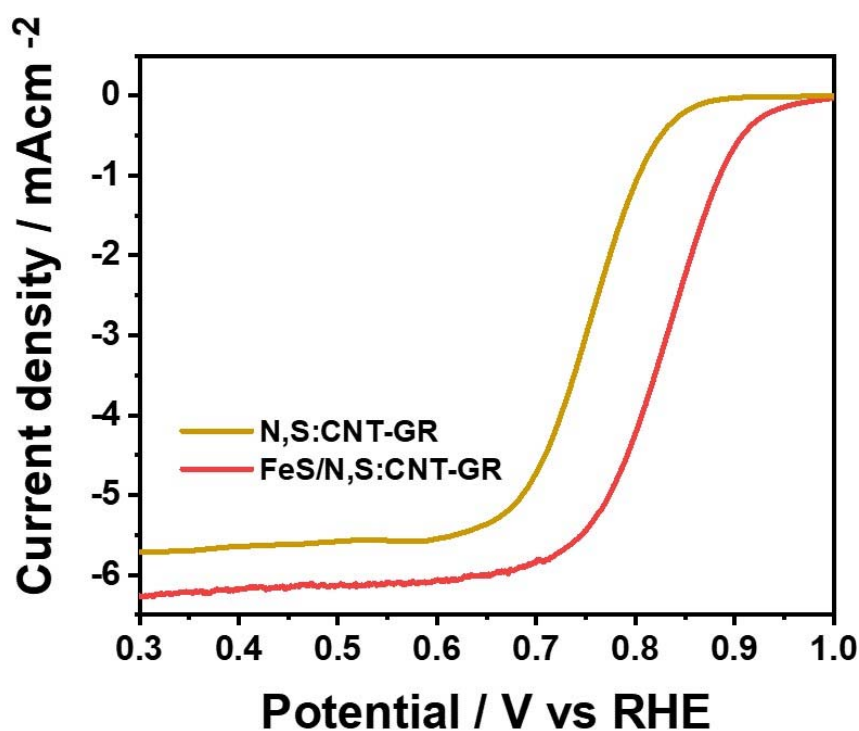

Figure S7. LSV curves of FeS/N,S:CNT-GR and N,S:CNT-GR.

Table S1. Comparison of BET surface area, pore volume, and average pores size of the prepared catalysts with TMS-based electrocatalysts.

| Catalysts                                                     | BET Surface Areas ( $\text{m}^2\cdot\text{g}^{-1}$ ) | Pore Volume ( $\text{cm}^3\cdot\text{g}^{-1}$ ) | Pore Size (nm) | References |
|---------------------------------------------------------------|------------------------------------------------------|-------------------------------------------------|----------------|------------|
| FeS/N,S:CNT-GR                                                | 191                                                  | 0.5568                                          | 4              | This work  |
| FeS/N,S:CNT                                                   | 174                                                  | 0.5067                                          | 4              | This work  |
| FeS/N,S:GR                                                    | 137                                                  | 0.4077                                          | 4              | This work  |
| FeS/G<br>(Fe:GO = 1:4)                                        | 334.15                                               | 0.91                                            | 4              | 1          |
| FeS/G<br>(Fe:GO = 1:1)                                        | 76.45                                                | 0.845                                           | 3.5            | 1          |
| FeS <sub>2</sub> -RGO                                         | 70.59                                                | -                                               | 4              | 2          |
| ECA-CNS<br>(cobalt nikel sulfide)                             | 71.4                                                 | -                                               | -              | 3          |
| Co <sub>9</sub> S <sub>8</sub> /N,S-CNS<br>(carbon nanosheet) | 22                                                   | -                                               | 10             | 4          |
| CoS <sub>2</sub> (400)/N,S-GO                                 | 19                                                   | -                                               | 3.5            | 5          |

#### Supplementary References

- Gautam, J.; Tran, D.T.; Singh, T.I.; Kim, N.H.; Lee, J.H. Mesoporous iron sulfide nanoparticles anchored graphene sheet as an efficient and durable catalyst for oxygen reduction reaction. *J. Power Sources* **2019**, *427*, 91–100.
- Jiang, J.; Zhu, L.; Chen, H.; Sun, Y.; Qian, W.; Lin, H.; Han, S. Highly active and stable electrocatalysts of FeS<sub>2</sub>-reduced graphene oxide for hydrogen evolution. *J. Mater. Sci.* **2019**, *54*(2), 1422–1433.
- Hong, Y. R.; Mhin, S.; Kim, K. M.; Han, W. S.; Choi, H.; Ali, G.; Chung, K.Y.; Lee, H.J.; Moon, S.I.; Dutta, S.; Sun, S.H.; Jung, Y.G.; Song, T.S.; Han, H. Electrochemically activated cobalt nickel sulfide for an efficient oxygen evolution reaction: partial amorphization and phase control. *J. Mater. Chem. A* **2019**, *7*(8), 3592–3602.
- Wu, C.; Zhang, Y.; Dong, D.; Xie, H.; Li, J. Co<sub>9</sub>S<sub>8</sub> nanoparticles anchored on nitrogen and sulfur dual-doped carbon nanosheets as highly efficient bifunctional electrocatalyst for oxygen evolution and reduction reactions. *Nanoscale* **2017**, *9*, 12432–12440.
- Ganesan, P.; Prabu, M.; Sanetuntikul, J.; Shanmugam, S. Cobalt sulfide nanoparticles grown on nitrogen and sulfur co-doped graphene oxide: An efficient electrocatalyst for oxygen reduction and evolution reactions, *ACS Catal* **2015**, *5*, 3625–3637.

**Table S2.** Comparison of ORR performance in 0.1 M KOH electrolyte of FeS/N,S:CNT-GR with other iron or TMS-based electrocatalysts.

| Catalysts                                      | Electrolyte | Onset Potential<br>(vs. RHE) | Half Potential<br>(vs. RHE) | Current Den-<br>sity at 0.3V<br>(mA cm <sup>-2</sup> ) | References |
|------------------------------------------------|-------------|------------------------------|-----------------------------|--------------------------------------------------------|------------|
| FeS/N,S:CNT-GR                                 | 0.1 M KOH   | 0.972                        | 0.827                       | −6.2                                                   | This work  |
| FP-Fe-TA-N-850                                 | 0.1 M KOH   | 0.98                         | -                           | −6                                                     | 1          |
| Fe-N/C                                         | 0.1 M KOH   | 0.923                        | -                           | −6                                                     | 2          |
| Fe-N-CNF                                       | 0.1 M KOH   | 0.93                         | 0.81                        | −5.12                                                  | 3          |
| Fe <sub>1-x</sub> S/N,S<br>MGCS                | 0.1 M KOH   | 0.97                         | 0.91                        | −6                                                     | 4          |
| FeS/G                                          | 0.1 M KOH   | 1.0                          | 0.845                       | −5                                                     | 5          |
| Co <sub>0.5</sub> Fe <sub>0.5</sub> S@N-<br>MC | 0.1 M KOH   | 0.913                        | 0.808                       | −6                                                     | 6          |
| Co <sub>9</sub> S <sub>8</sub> /N,S-CNS        | 0.1 M KOH   | 0.90                         | -                           | −5                                                     | 7          |
| CoS<br>NWs@NSC-2                               | 0.1 M KOH   | 0.93                         | 0.84                        | -                                                      | 8          |

### Supplementary References

- Wei, J.; Liang, Y.; Hu, Y.; Kong, B.; Simon, G.P.; Zhang, J.; Wang, H. A versatile iron–tannin-framework ink coating strategy to fabricate biomass-derived iron carbide/Fe-N-carbon catalysts for efficient oxygen reduction. *Angew. Chem. Int. Ed.* **2016**, *55*, 1355–1359.
- Lin, L.; Zhu, Q.; Xu, A.W. Noble-metal-free Fe-N/C catalyst for highly efficient oxygen reduction reaction under both alkaline and acidic conditions. *J. Am. Chem. Soc.* **2014**, *136*, 11027–11033.
- Wu, Z.Y.; Xu, X.X.; Hu, B.C.; Liang, H.W.; Lin, Y.; Chen, L.F.; Yu, S.H., Iron carbide nanoparticles encapsulated in mesoporous Fe-N-doped carbon nanofibers for efficient electrocatalysis. *Angew. Chem.* **2015**, *127*, 8297–8301.
- Xiao, J.; Xia, Y.; Hu, C.; Xi, J.; Wang, S. Raisin bread-like iron sulfides/nitrogen and sulfur dual-doped mesoporous graphitic carbon spheres: a promising electrocatalyst for the oxygen reduction reaction in alkaline and acidic media. *J. Mater. Chem. A* **2017**, *5*, 11114–11123.
- Gautam, J.; Tran, D.T.; Singh, T.I.; Kim, N.H.; Lee, J.H. Mesoporous iron sulfide nanoparticles anchored graphene sheet as an efficient and durable catalyst for oxygen reduction reaction. *J. Power Sources* **2019**, *427*, 91–100.
- Shen, M.; Ruan, C.; Chen, Y.; Jiang, C.; Ai, K.; Lu, L. Covalent entrapment of cobalt–iron sulfides in N-doped mesoporous carbon: Extraordinary bifunctional electrocatalysts for oxygen reduction and evolution reactions. *ACS Appl. Mater. Interfaces* **2015**, *7*, 1207–1218.
- Wu, C.; Zhang, Y.; Dong, D.; Xie, H.; Li, J. Co<sub>9</sub>S<sub>8</sub> nanoparticles anchored on nitrogen and sulfur dual-doped carbon nanosheets as highly efficient bifunctional electrocatalyst for oxygen evolution and reduction reactions. *Nanoscale* **2017**, *9*, 12432–12440.
- Han, C.; Li, Q.; Wang, D.; Lu, Q.; Xing, Z.; Yang, X. Cobalt sulfide nanowires core encapsulated by a N, S codoped graphitic carbon shell for efficient oxygen reduction reaction. *Small* **2018**, *14*, 1703642.
